# Supplementary material for: Super-enhancer-driven lncRNA-DAW promotes liver cancer cell proliferation through activation of Wnt/β-catenin pathway
Source: PubMed Central journal article supplement — Mol Ther Nucleic Acids. 2021 Nov 3;26:1351–63. doi: 10.1016/j.omtn.2021.10.028 (PMC8608597; doi:10.1016/j.omtn.2021.10.028), 2021-11-03
Supplement: mmc1.pdf [file mmc1.pdf]

OMTN, Volume 26

## Supplemental information

**Super-enhancer-driven lncRNA-DAW promotes  
liver cancer cell proliferation through  
activation of Wnt/ $\beta$ -catenin pathway**

**Weicheng Liang, Chuanjian Shi, Weilong Hong, Panlong Li, Xue Zhou, Weiming Fu, Lizhu Lin, and Jinfang Zhang**

## Supporting documents

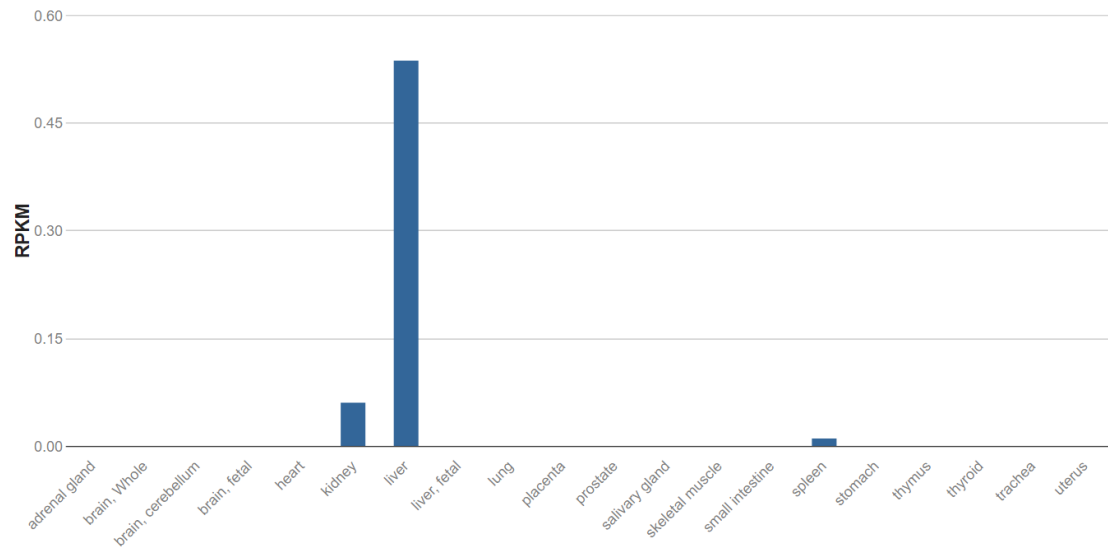

Supplementary Fig. 1. The expression profiles of lincRNA-DAW in 20 human tissues (<https://www.ncbi.nlm.nih.gov/gene/?term=linc01430>).

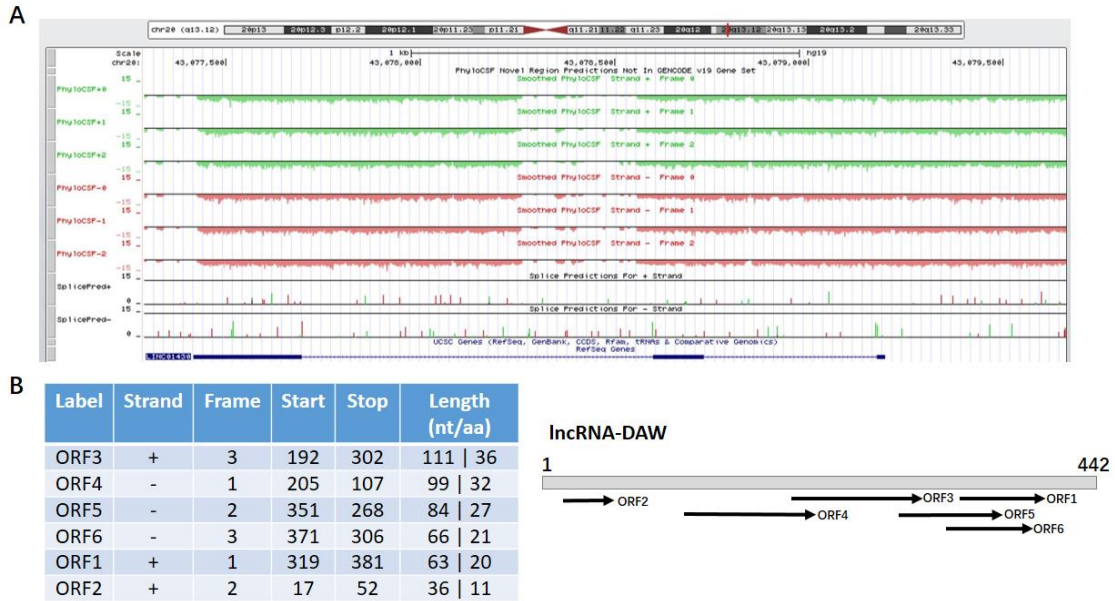

Supplementary Fig. 2. Analysis of potential ORFs expressed from IncRNA-DAW. (A) The codon substitution frequency scores (CSF) of IncRNA-DAW and negative score of CSF indicated that IncRNA-DAW did not have protein-coding potential. (B) The prediction with ORF Finder (NCBI) showed the potential peptides encoded by IncRNA-DAW (<https://www.ncbi.nlm.nih.gov/orffinder>).

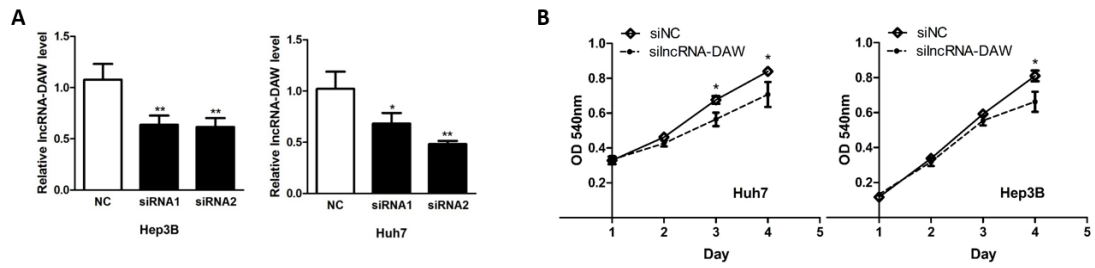

Supplementary Fig. 3. Silencing of IncRNA-DAW suppress liver cancer cell growth. (A) The RNA levels of IncRNA-DAW were evaluated after transient silencing of siRNAs targeting IncRNA-DAW. (B) MTT assays showed that knockdown of IncRNA-DAW impaired cancer cell proliferation. (\*,  $P < 0.05$ ; \*\*,  $P < 0.01$ )

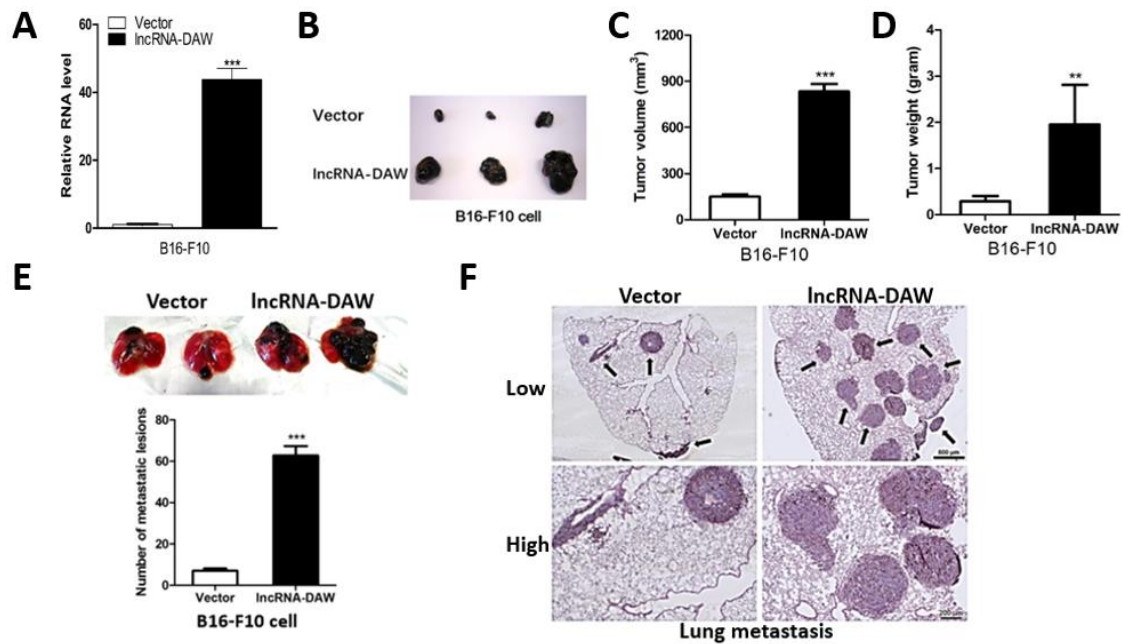

Supplementary Fig. 4. Reinforced expression of lncRNA-DAW enhanced *in vivo* tumor growth and tumor metastasis. (A) The RNA level of lncRNA-DAW was evaluated after stable expression of lncRNA-DAW. (B) The lncRNA-DAW and vector-transfected stable B16-F10 cells were subcutaneously injected into nude mice (n=5). The nude mice were sacrificed at the indicated time points and the tumor tissues were harvested. (C&D) Tumor weight and volumes were measured and calculated. (E) The lncRNA-DAW and vector-transfected stable cells were introduced into nude mice through hydrodynamic tail vein injection. The lung tissues were collected at the indicated time. And the metastatic sites under the microscope were counted and calculated. (F) The lung tissues were subjected to H&E staining. Representative pictures were captured and showed. (\*,  $P < 0.05$ ; \*\*,  $P < 0.01$ ; \*\*\*,  $P < 0.001$ .)

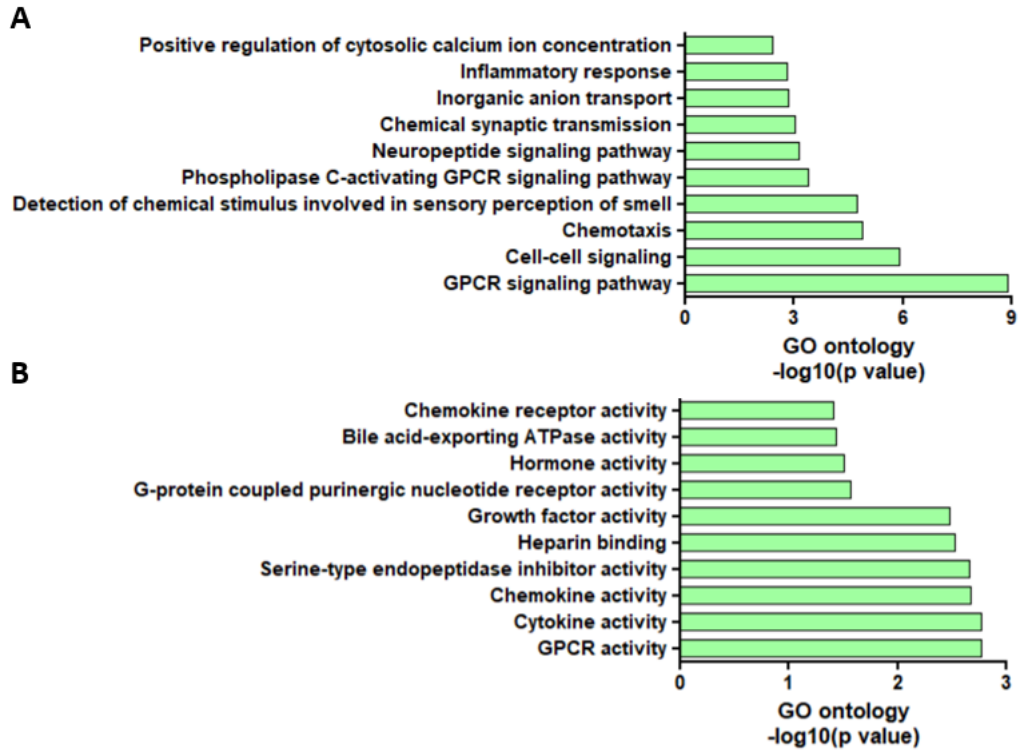

Supplementary Fig. 5. Gene ontology enrichment analysis was conducted by using DAVID website. (A) Gene ontology analysis was performed on the upregulated genes after ectopic expression of lncRNA-DAW. (B) Gene ontology analysis was performed on the downregulated genes after ectopic expression of lncRNA-DAW.

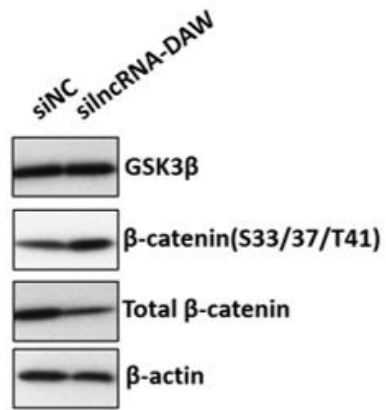

Supplementary Fig. 6. Transient silencing of lncRNA-DAW reduced protein level of  $\beta$ -catenin.

**A**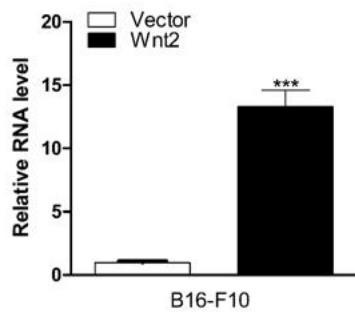**B**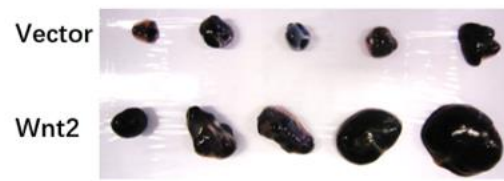**C**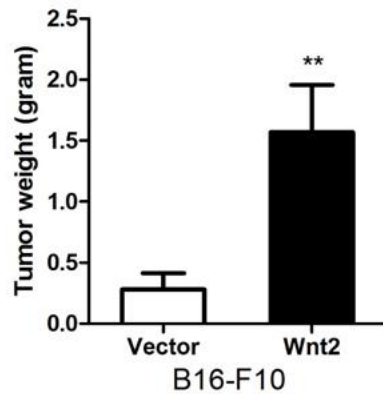**D**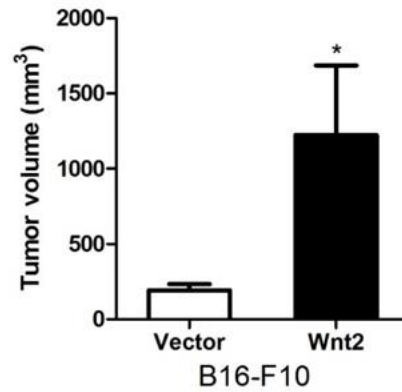

Supplementary Fig. 7. Stable overexpression of Wnt2 promoted *in vivo* tumor growth. (A) The RNA level of Wnt2 was evaluated after stable expression of Wnt2. (B) The Wnt2 and corresponding vector-transfected stable B16-F10 cells were subcutaneously injected into nude mice (n=5). The nude mice were sacrificed and the tumor tissues were collected. (C) Tumor weight was measured and calculated. (D) Tumor volumes were measured and calculated. (\*,  $P < 0.05$ ; \*\*,  $P < 0.01$ )



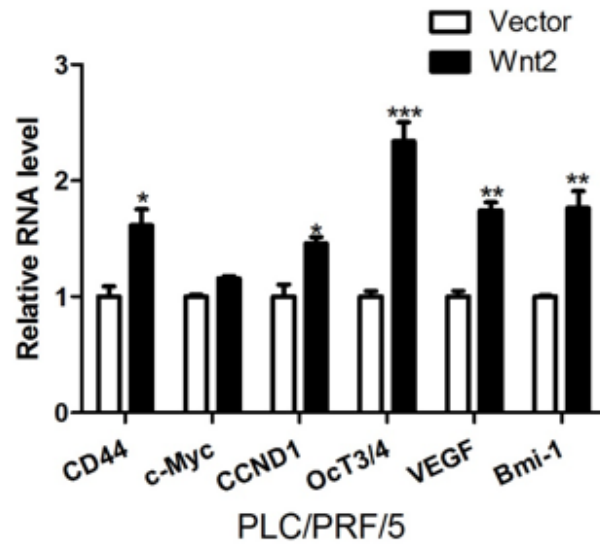

Supplementary Fig. 8. Overexpression of Wnt2 in PLC/PRF/5 cells significantly activated the expression of  $\beta$ -catenin target genes. (\*,  $P < 0.05$ ; \*\*,  $P < 0.01$ ; \*\*\*,  $P < 0.001$ .)

**Supplementary Table 1 The primer sequence used in this study.**

| <b>Name</b>        | <b>Primer sequences used for plasmid construction</b> |
|--------------------|-------------------------------------------------------|
| pbabe-lncRNA-DAW-F | CGCGGATCCGACCACTCGTGTGTGGATGA                         |
| pbabe-lncRNA-DAW-R | ACGCGTCGACAAAATAAAGTAAAATTCTCTGATTCTGT                |
| pBabe-Wnt2-F       | CGCGGATCCATGAACGCCCTCTCGGT                            |
| pBabe-Wnt2-R       | ACGCGTCGACTCATGTAGCGGTTGTCCAG                         |
| <b>Name</b>        | <b>Primer sequences used for RT-PCR</b>               |
| lncRNA-DAW-F       | CTAAGCCCAACCCTGATCCA                                  |
| lncRNA-DAW-R       | CGTGTTTGTCTGGAAGTGCT                                  |
| U1_F               | TGATCACGAAGGTGGTTTTCC                                 |
| U1_R               | GCACATCCGGAGTGCAATG                                   |
| $\beta$ -actin_F   | AAGATGACCAGATCATGTTTGAG                               |
| $\beta$ -actin_R   | GCAGCTCGTAGCTCTTCTCCAG                                |
| RPLPO_F            | CCGGATATGAGGCAGCAGTT                                  |
| RPLPO_R            | GAAGGCTGTGGTGCTGATGG                                  |
| Bmi1_F             | GTGCTTTGTGGAGGGTACTTCAT                               |
| Bmi1_R             | TTGGACATCACAATAGGACAATACTT                            |
| MYOD1-F            | CGGACGTGCCTTCTGAGTC                                   |
| MYOD1-R            | AGCACCTGGTATATCGGGTTG                                 |
| MMP1-F             | AGCTAGCTCAGGATGACATTGATG                              |
| MMP1-R             | GCCGATGGGCTGGACAG                                     |
| WISP1-F            | CCAGCCTAACTGCAAGTACAA                                 |
| WISP1-R            | GGCGTCGTCCCTCACATACC                                  |
| Wnt2-F             | GATGCGTGCCATTAGCCAG                                   |
| Wnt2-R             | AGATTCCCGACTACTTCGGAG                                 |
| Wnt9b-F            | TGTGCGGTGACAACCTCAAG                                  |
| Wnt9b-R            | ACAGGAGCCTGATACGCCAT                                  |
| DKK4-F             | ACGGACTGCAATACCAGAAAG                                 |
| DKK4-R             | CGTTCACACAGAGTGTCCCAG                                 |
| CCL8-F             | TGGAGAGCTACACAAGAATCACC                               |
| CCL8-R             | TGGTCCAGATGCTTCATGGAA                                 |
| <b>Name</b>        | <b>siRNA sequences</b>                                |
| silncRNA-DAW-1     | GUUGAGCACUUCCAGACAATT                                 |
| silncRNA-DAW-2     | CAAGGACAGUGUUAUGAUTT                                  |
| <b>Name</b>        | <b>CHIP primer sequence</b>                           |
| Wnt-2-CHIP-F       | TGCTTTGGCAGATACTGCTG                                  |
| Wnt-2-CHIP-R       | CTGAAGCTGGGATGAAGAGC                                  |
